# Supplementary material for: Producing polished prokaryotic pangenomes with the Panaroo pipeline
Source: PubMed Central journal article supplement (PMC7376924; doi:10.1186/s13059-020-02090-4), 2020-07-22
Supplement: 13059_2020_2090_MOESM1_ESM.pdf [file 13059_2020_2090_MOESM1_ESM.pdf]

## Additional file 1

| Gain/Loss Ratio | Mutation Rate | Source of Error                          |
|-----------------|---------------|------------------------------------------|
| 0.1             | 1.00E-14      | NA                                       |
| 1               | 1.00E-14      | NA                                       |
| 10              | 1.00E-14      | NA                                       |
| 10              | 1.00E-15      | NA                                       |
| 10              | 1.00E-16      | NA                                       |
| 10              | 1.00E-14      | Fragmentation                            |
| 10              | 1.00E-14      | Contamination with <i>S. epidermidis</i> |

**Table S1:** Parameters used to simulate pangenomes using the Infinitely Many Genes model.

| Gene       | lrt-pvalue | beta    | beta-std-err | Antibiotic | Annotation                                                 |
|------------|------------|---------|--------------|------------|------------------------------------------------------------|
| gatC       | 9.38E-06   | 0.402   | 0.0903       | PEN        | aspartyl/glutamyl-tRNA amidotransferase subunit C          |
| group_111  | 4.82E-07   | 0.319   | 0.063        | PEN        | ATP synthase FOF1 subunit delta                            |
| group_1126 | 3.60E-08   | 0.18    | 0.0324       | PEN        | putative thiosulfate sulfurtransferase                     |
| group_1140 | 9.18E-06   | -0.108  | 0.0242       | AZM        | ArsR family transcriptional regulator                      |
| group_1168 | 2.95E-10   | 0.317   | 0.0498       | PEN        | integral membrane protein                                  |
| group_1237 | 1.92E-20   | 0.165   | 0.0174       | TET        | putative phage associated protein;phage associated protein |
| group_1333 | 4.44E-07   | 0.263   | 0.0517       | CFM        | two-component system transcriptional response regulator    |
| group_1333 | 5.93E-18   | 0.499   | 0.0568       | PEN        | two-component system transcriptional response regulator    |
| group_1333 | 4.44E-07   | 0.263   | 0.0517       | CRO        | two-component system transcriptional response regulator    |
| group_134  | 4.48E-06   | 0.211   | 0.0458       | CRO        | TonB-dependent receptor protein                            |
| group_134  | 2.30E-19   | 0.439   | 0.0478       | PEN        | TonB-dependent receptor protein                            |
| group_134  | 4.48E-06   | 0.211   | 0.0458       | CFM        | TonB-dependent receptor protein                            |
| group_1387 | 5.01E-09   | 0.12    | 0.0203       | TET        | putative maltose phosphorylase                             |
| group_144  | 9.10E-06   | 0.149   | 0.0334       | PEN        | elongation factor G                                        |
| group_1491 | 3.64E-08   | 0.261   | 0.047        | PEN        | phage protein                                              |
| group_1496 | 2.09E-08   | 0.332   | 0.0587       | PEN        | membrane protein                                           |
| group_1511 | 2.17E-07   | 0.377   | 0.0722       | PEN        | phage protein                                              |
| group_1611 | 9.18E-06   | -0.108  | 0.0242       | AZM        | phage associated protein;hypothetical protein              |
| group_1623 | 2.65E-07   | 0.256   | 0.0494       | CRO        | phage associated protein                                   |
| group_1623 | 1.34E-17   | 0.486   | 0.0559       | PEN        | phage associated protein                                   |
| group_1623 | 2.65E-07   | 0.256   | 0.0494       | CFM        | phage associated protein                                   |
| group_1693 | 8.09E-15   | 0.122   | 0.0155       | TET        | putative cytochrome C                                      |
| group_1708 | 2.65E-07   | 0.256   | 0.0494       | CFM        | VapD-like protein                                          |
| group_1708 | 1.34E-17   | 0.486   | 0.0559       | PEN        | VapD-like protein                                          |
| group_1708 | 2.65E-07   | 0.256   | 0.0494       | CRO        | VapD-like protein                                          |
| group_172  | 7.24E-06   | 0.202   | 0.0447       | PEN        | IS1016 transposase                                         |
| group_1753 | 2.42E-08   | 0.419   | 0.0745       | CRO        | YegA                                                       |
| group_1753 | 4.11E-09   | 0.472   | 0.0796       | PEN        | YegA                                                       |
| group_1753 | 2.42E-08   | 0.419   | 0.0745       | CFM        | YegA                                                       |
| group_238  | 1.78E-08   | -0.0668 | 0.0118       | TET        | amidophosphoribosyltransferase                             |
| group_299  | 4.82E-07   | 0.319   | 0.063        | PEN        | NADH:ubiquinone dehydrogenase L subunit                    |
| group_380  | 9.10E-06   | 0.149   | 0.0334       | PEN        | arsenate reductase                                         |
| group_438  | 9.18E-06   | -0.108  | 0.0242       | AZM        | phosphoribosylaminoimidazole carboxylase ATPase subunit    |
| group_451  | 2.42E-08   | 0.419   | 0.0745       | CRO        | Protein rnfH                                               |
| group_451  | 4.11E-09   | 0.472   | 0.0796       | PEN        | Protein rnfH                                               |
| group_451  | 2.42E-08   | 0.419   | 0.0745       | CFM        | Protein rnfH                                               |
| group_464  | 2.22E-08   | 0.178   | 0.0316       | PEN        | ABC transporter ATP-binding protein                        |
| group_914  | 9.62E-07   | 0.0566  | 0.0115       | CIP        | phage repressor phage associated protein                   |
| group_945  | 4.82E-07   | 0.319   | 0.063        | PEN        | ABC transporter permease amino acid                        |
| porB       | 1.63E-06   | -0.152  | 0.0316       | PEN        | major outer membrane protein porin P.IB; P.I               |
| rplW       | 1.53E-08   | -0.327  | 0.0574       | AZM        | 50S ribosomal protein L23                                  |

**Table S2:** Significant pan-GWAS results for antibiotic resistance in the EuroGASP collection

| variant                                                                                                                        | af     | filter-pvalue | lrt-pvalue | beta    | beta-std-err | variant_h2 | antibiotic |
|--------------------------------------------------------------------------------------------------------------------------------|--------|---------------|------------|---------|--------------|------------|------------|
| metG-group_1858-pilE_1_pilE_pilE_3_pilS5_pilS2_1_pilE_2                                                                        | 0.0398 | 1.79E-09      | 4.85E-45   | -0.36   | 0.0244       | 0.415      | CIP        |
| group_946-group_1499-group_1846                                                                                                | 0.0133 | 0.0379        | 5.08E-45   | 0.317   | 0.0215       | 0.415      | TET        |
| hemC-group_1846-group_1499                                                                                                     | 0.0133 | 0.0379        | 5.08E-45   | 0.317   | 0.0215       | 0.415      | TET        |
| group_1056-group_1846-pepN                                                                                                     | 0.0218 | 7.10E-35      | 3.75E-43   | -0.377  | 0.0261       | 0.406      | TET        |
| group_885-group_1826-group_1827                                                                                                | 0.0275 | 1.13E-45      | 7.11E-43   | -0.273  | 0.019        | 0.405      | TET        |
| group_143-group_933-group_1118                                                                                                 | 0.0133 | 2.26E-10      | 2.84E-39   | 0.31    | 0.0226       | 0.388      | TET        |
| group_212-group_592-group_1675                                                                                                 | 0.0199 | 2.62E-31      | 1.90E-31   | -0.256  | 0.0212       | 0.348      | TET        |
| group_644-group_801-group_505                                                                                                  | 0.0256 | 4.65E-42      | 5.58E-29   | -0.257  | 0.0223       | 0.335      | TET        |
| group_1236-group_1556-group_1237                                                                                               | 0.0598 | 8.52E-07      | 1.83E-28   | 0.23    | 0.0202       | 0.332      | TET        |
| group_505-group_1775-group_1232                                                                                                | 0.0247 | 2.95E-40      | 4.42E-27   | -0.251  | 0.0227       | 0.323      | TET        |
| group_1775-group_505-group_801                                                                                                 | 0.0237 | 1.85E-38      | 1.11E-23   | -0.231  | 0.0225       | 0.302      | TET        |
| group_238-group_1556-group_1236                                                                                                | 0.0949 | 3.87E-42      | 1.83E-22   | -0.189  | 0.019        | 0.294      | TET        |
| group_936-group_885-group_1826                                                                                                 | 0.102  | 1.26E-19      | 3.17E-22   | -0.121  | 0.0122       | 0.292      | TET        |
| group_1367-group_1237-group_1556                                                                                               | 0.0294 | 0.76          | 1.11E-21   | 0.206   | 0.0211       | 0.289      | TET        |
| group_1824-group_164-group_1899                                                                                                | 0.0123 | 0.0199        | 1.53E-20   | 0.176   | 0.0185       | 0.281      | CIP        |
| group_1229-group_1118-group_933                                                                                                | 0.0218 | 6.11E-25      | 3.74E-20   | 0.183   | 0.0195       | 0.278      | TET        |
| group_936-group_885-group_1827                                                                                                 | 0.0417 | 0.971         | 6.45E-19   | 0.123   | 0.0136       | 0.269      | TET        |
| group_1335-group_1794-group_1099                                                                                               | 0.018  | 0.00505       | 2.90E-18   | 0.358   | 0.0403       | 0.264      | CRO        |
| group_1720-group_75-group_1901                                                                                                 | 0.0503 | 7.80E-79      | 1.96E-17   | -0.258  | 0.0299       | 0.258      | SMX        |
| group_1367-group_238-group_1556                                                                                                | 0.102  | 4.08E-50      | 1.51E-16   | -0.142  | 0.0169       | 0.251      | TET        |
| group_1393-group_1795-group_1690                                                                                               | 0.0104 | 0.00778       | 4.41E-16   | 0.204   | 0.0247       | 0.247      | TET        |
| group_1032-group_1894-group_1051                                                                                               | 0.0123 | 0.226         | 7.84E-16   | 0.145   | 0.0177       | 0.245      | CIP        |
| group_1630-ppsR-group_1489                                                                                                     | 0.0237 | 0.203         | 1.78E-15   | -0.147  | 0.0182       | 0.242      | CIP        |
| ppsA-group_1489-ppsR                                                                                                           | 0.0237 | 0.203         | 1.78E-15   | -0.147  | 0.0182       | 0.242      | CIP        |
| group_1332-group_1826-group_117                                                                                                | 0.0114 | 0.0123        | 7.75E-15   | -0.163  | 0.0206       | 0.236      | CIP        |
| rho-ppsA-group_1489                                                                                                            | 0.0247 | 0.145         | 9.58E-15   | -0.14   | 0.0178       | 0.235      | CIP        |
| group_136-group_1367-group_1237                                                                                                | 0.037  | 0.398         | 1.12E-14   | 0.136   | 0.0174       | 0.235      | TET        |
| group_68-group_64-group_37                                                                                                     | 0.0342 | 0.000752      | 1.25E-14   | -0.126  | 0.0161       | 0.234      | CIP        |
| group_64-group_37-group_915                                                                                                    | 0.0342 | 0.000752      | 1.25E-14   | -0.126  | 0.0161       | 0.234      | CIP        |
| group_1333-group_117-group_1826                                                                                                | 0.0123 | 0.00691       | 1.92E-14   | -0.157  | 0.0202       | 0.233      | CIP        |
| group_190-group_577-group_150                                                                                                  | 0.0294 | 0.377         | 2.73E-14   | 0.111   | 0.0144       | 0.231      | TET        |
| hemC-group_1846-pepN                                                                                                           | 0.0266 | 3.68E-17      | 6.23E-14   | -0.141  | 0.0186       | 0.228      | TET        |
| rpsS-rplB-group_1157                                                                                                           | 0.829  | 7.48E-31      | 6.85E-14   | 0.575   | 0.0757       | 0.228      | AZM        |
| rpsS-rplB-rplW                                                                                                                 | 0.171  | 7.48E-31      | 6.85E-14   | -0.575  | 0.0757       | 0.228      | AZM        |
| group_676-mafB_mafB_2-group_1127                                                                                               | 0.0266 | 0.000891      | 1.19E-13   | 0.675   | 0.0898       | 0.226      | CRO        |
| group_1895-group_493-group_1591                                                                                                | 0.858  | 2.81E-35      | 1.91E-13   | 0.56    | 0.0752       | 0.224      | AZM        |
| group_702-group_1633-group_1869                                                                                                | 0.0171 | 0.458         | 1.93E-13   | 0.142   | 0.019        | 0.224      | TET        |
| group_1051-group_460-group_1482                                                                                                | 0.0104 | 0.0217        | 2.24E-13   | 0.128   | 0.0172       | 0.223      | CIP        |
| group_446-pepN-group_1846                                                                                                      | 0.0531 | 1.40E-10      | 1.20E-12   | -0.107  | 0.0149       | 0.217      | TET        |
| group_972-group_1612-group_1829                                                                                                | 0.0323 | 8.11E-07      | 1.36E-12   | 0.104   | 0.0145       | 0.216      | CIP        |
| group_563-group_303-group_1171                                                                                                 | 0.0218 | 9.75E-17      | 1.79E-12   | -0.138  | 0.0193       | 0.215      | TET        |
| group_2008-group_1991-group_1972                                                                                               | 0.135  | 1.55E-05      | 2.46E-12   | -0.105  | 0.0148       | 0.214      | TET        |
| group_393-group_262-group_1171                                                                                                 | 0.0199 | 3.84E-16      | 4.36E-12   | -0.141  | 0.0201       | 0.211      | TET        |
| group_303-group_1171-group_262                                                                                                 | 0.019  | 1.31E-14      | 6.45E-12   | -0.142  | 0.0204       | 0.209      | TET        |
| group_1121-group_1531-group_1176                                                                                               | 0.0228 | 0.458         | 8.01E-12   | 0.202   | 0.0292       | 0.209      | AZM        |
| group_255-group_841-group_1576                                                                                                 | 0.488  | 4.57E-82      | 8.19E-12   | 0.312   | 0.0451       | 0.208      | PEN        |
| metG-group_1576-group_841                                                                                                      | 0.488  | 4.57E-82      | 8.19E-12   | 0.312   | 0.0451       | 0.208      | PEN        |
| group_758-group_841-group_255                                                                                                  | 0.512  | 4.57E-82      | 8.19E-12   | -0.312  | 0.0451       | 0.208      | PEN        |
| group_758-group_1576-metG                                                                                                      | 0.512  | 4.57E-82      | 8.19E-12   | -0.312  | 0.0451       | 0.208      | PEN        |
| group_2024-group_1993-group_1985                                                                                               | 0.14   | 1.43E-05      | 1.03E-11   | -0.0985 | 0.0143       | 0.207      | TET        |
| rho-ppsA-ppsR                                                                                                                  | 0.0285 | 0.00396       | 3.69E-11   | 0.0904  | 0.0135       | 0.202      | CIP        |
| group_1630-ppsR-ppsA                                                                                                           | 0.0285 | 0.00396       | 3.69E-11   | 0.0904  | 0.0135       | 0.202      | CIP        |
| dut-group_385-group_1465                                                                                                       | 0.0104 | 0.0225        | 4.32E-11   | 0.603   | 0.0906       | 0.201      | CRO        |
| group_1066-group_1531-group_1176                                                                                               | 0.544  | 1.83E-09      | 4.49E-11   | -0.173  | 0.026        | 0.201      | AZM        |
| group_1711-group_1694-group_1894                                                                                               | 0.0266 | 1.94E-27      | 8.25E-11   | -0.135  | 0.0205       | 0.198      | TET        |
| pyrG-group_1870-group_714                                                                                                      | 0.0304 | 0.74          | 1.07E-10   | 0.235   | 0.036        | 0.197      | PEN        |
| group_95-group_363-group_1224                                                                                                  | 0.0455 | 3.36E-10      | 1.12E-10   | -0.311  | 0.0478       | 0.197      | CIP        |
| group_363-group_95-group_1299                                                                                                  | 0.0455 | 3.36E-10      | 1.12E-10   | -0.311  | 0.0478       | 0.197      | CIP        |
| group_177-group_791-group_892                                                                                                  | 0.0152 | 7.03E-07      | 3.50E-10   | -0.13   | 0.0205       | 0.192      | TET        |
| group_1066-group_1121-group_1558                                                                                               | 0.97   | 0.327         | 4.70E-10   | -0.162  | 0.0257       | 0.19       | AZM        |
| group_182-group_714-group_1870                                                                                                 | 0.0114 | 1.79E-12      | 8.68E-10   | -0.154  | 0.0249       | 0.187      | TET        |
| group_1134-alaS-group_67                                                                                                       | 0.0304 | 0.00204       | 1.14E-09   | 0.0918  | 0.0149       | 0.186      | TET        |
| group_283-group_67-alaS                                                                                                        | 0.0304 | 0.00204       | 1.14E-09   | 0.0918  | 0.0149       | 0.186      | TET        |
| group_185-group_274-group_908                                                                                                  | 0.737  | 1.49E-08      | 1.42E-09   | -0.0695 | 0.0114       | 0.185      | TET        |
| group_2007-group_1985-group_1993                                                                                               | 0.214  | 0.175         | 1.58E-09   | -0.0818 | 0.0134       | 0.185      | TET        |
| group_1531-group_1121-group_1558                                                                                               | 0.0275 | 0.637         | 1.60E-09   | 0.157   | 0.0258       | 0.184      | AZM        |
| group_1401-group_1332-group_1826                                                                                               | 0.0161 | 0.343         | 1.92E-09   | -0.0982 | 0.0162       | 0.184      | CIP        |
| group_1824-group_164-opaD_pilC                                                                                                 | 0.0332 | 0.0109        | 2.68E-09   | -0.0883 | 0.0147       | 0.182      | CIP        |
| group_292-group_412-group_321                                                                                                  | 0.0342 | 2.07E-07      | 4.03E-09   | 0.143   | 0.024        | 0.18       | AZM        |
| group_1126-mafB_mafB_2-group_1136                                                                                              | 0.315  | 1.17E-10      | 4.05E-09   | 0.205   | 0.0345       | 0.18       | PEN        |
| group_2026-group_2011-group_2005                                                                                               | 0.225  | 0.201         | 7.69E-09   | -0.0756 | 0.013        | 0.177      | TET        |
| group_1066-group_1531-group_1190                                                                                               | 0.426  | 1.44E-11      | 7.80E-09   | -0.183  | 0.0314       | 0.177      | CRO        |
| group_683-group_385-group_1738                                                                                                 | 0.0503 | 0.0135        | 8.26E-09   | 0.473   | 0.0815       | 0.176      | CRO        |
| group_1516-group_1056-group_1846                                                                                               | 0.0152 | 1.77E-22      | 9.22E-09   | -0.149  | 0.0257       | 0.176      | TET        |
| group_702-group_1633-group_1902                                                                                                | 0.0209 | 0.00462       | 9.51E-09   | 0.0917  | 0.0158       | 0.176      | CIP        |
| ispH-lspA-group_1875                                                                                                           | 0.0588 | 0.000396      | 1.14E-08   | 0.106   | 0.0184       | 0.175      | AZM        |
| rplB-group_1157-rplD                                                                                                           | 0.824  | 1.14E-30      | 1.53E-08   | 0.327   | 0.0574       | 0.173      | AZM        |
| rplC-rplD-group_1157                                                                                                           | 0.824  | 1.14E-30      | 1.53E-08   | 0.327   | 0.0574       | 0.173      | AZM        |
| rplC-rplD-rplW                                                                                                                 | 0.176  | 1.14E-30      | 1.53E-08   | -0.327  | 0.0574       | 0.173      | AZM        |
| group_976-group_494-group_1552                                                                                                 | 0.278  | 7.66E-09      | 1.65E-08   | -0.109  | 0.0192       | 0.173      | AZM        |
| group_494-group_1552-tpbA                                                                                                      | 0.278  | 7.66E-09      | 1.65E-08   | -0.109  | 0.0192       | 0.173      | AZM        |
| pilS1_pilE_pilE_1_pilE1_pilS6_2_pilS5_pilS2_pilS6_pilS6_1_pilE_2_pilE_3_pilE_1_pilS6_pilE_pilE1_pilE_pilE_1_pilS6_pilE1_pilE_2 | 0.0408 | 0.432         | 2.87E-08   | 0.178   | 0.0317       | 0.17       | CRO        |
| pilS5_pilE_pilS2_pilE_1_pilE1_pilS6_pilS6_pilE_pilS2                                                                           | 0.0104 | 7.70E-11      | 3.06E-08   | 0.161   | 0.0288       | 0.17       | TET        |
| group_205-pyrG-group_1870                                                                                                      | 0.0361 | 0.734         | 3.16E-08   | 0.191   | 0.0343       | 0.169      | PEN        |
| group_903-pyrG-group_1759-group_1716                                                                                           | 0.0142 | 0.0115        | 3.39E-08   | -0.177  | 0.0319       | 0.169      | CRO        |
| group_1404-group_321-group_412                                                                                                 | 0.038  | 1.37E-07      | 3.51E-08   | 0.126   | 0.0226       | 0.169      | AZM        |
| group_1751-group_1224-group_363                                                                                                | 0.0465 | 1.84E-10      | 4.12E-08   | -0.226  | 0.041        | 0.168      | CIP        |
| group_1951-group_46-group_886                                                                                                  | 0.0123 | 0.597         | 4.21E-08   | -0.351  | 0.0636       | 0.168      | PEN        |
| group_451-group_714-group_1870                                                                                                 | 0.0218 | 0.136         | 4.52E-08   | 0.246   | 0.0446       | 0.167      | PEN        |
| group_1761-group_1801-group_1749                                                                                               | 0.0664 | 6.69E-05      | 5.18E-08   | -0.0652 | 0.0119       | 0.167      | TET        |
| group_1103-group_953-group_899                                                                                                 | 0.0152 | 0.00122       | 6.37E-08   | 0.16    | 0.0294       | 0.166      | CIP        |
| group_185-group_274-group_167                                                                                                  | 0.0408 | 9.82E-10      | 7.58E-08   | 0.0633  | 0.0117       | 0.165      | CIP        |
| group_536-group_940-group_252                                                                                                  | 0.0199 | 1.41E-21      | 8.45E-08   | 0.162   | 0.03         | 0.164      | TET        |
| group_940-group_252-group_757                                                                                                  | 0.0199 | 1.41E-21      | 8.45E-08   | 0.162   | 0.03         | 0.164      | TET        |
| group_1514-group_679-porB                                                                                                      | 0.229  | 5.98E-14      | 8.51E-08   | -0.16   | 0.0296       | 0.164      | PEN        |
| lpxC-pilS5_pilE_2_pilS5_2_pilE_pilE1_pilE_1_pilE_4-group_1778                                                                  | 0.0133 | 0.00407       | 8.87E-08   | 0.133   | 0.0247       | 0.164      | CRO        |
| group_136-group_1367-group_238                                                                                                 | 0.166  | 5.32E-37      | 1.11E-07   | -0.0617 | 0.0115       | 0.163      | TET        |
| ileS-group_1875-lspA                                                                                                           | 0.0408 | 0.0324        | 1.13E-07   | 0.116   | 0.0217       | 0.162      | AZM        |
| group_1126-mafB_mafB_2-group_1100                                                                                              | 0.766  | 4.67E-24      | 1.21E-07   | 0.171   | 0.0321       | 0.162      | PEN        |
| group_976-group_494-group_1864                                                                                                 | 0.0787 | 5.06E-15      | 1.25E-07   | 0.101   | 0.019        | 0.162      | AZM        |
| group_1136-mafB_mafB_2-group_1127                                                                                              | 0.0607 | 0.191         | 1.30E-07   | 0.247   | 0.0465       | 0.162      | PEN        |
| group_1265-group_1890-group_1901                                                                                               | 0.0209 | 3.42E-06      | 1.39E-07   | -0.367  | 0.0691       | 0.161      | PEN        |
| pip-opaD_pilC-group_164                                                                                                        | 0.0275 | 0.11          | 1.54E-07   | -0.0839 | 0.0159       | 0.161      | CIP        |
| group_992-group_128-group_1602                                                                                                 | 0.018  | 3.33E-21      | 2.32E-07   | 0.158   | 0.0304       | 0.158      | TET        |
| group_1562-group_1190-group_1176                                                                                               | 0.319  | 1.63E-09      | 2.53E-07   | 0.109   | 0.021        | 0.158      | SMX        |
| lpxC-pilS5_pilE_2_pilS5_2_pilE_pilE1_pilE_1_pilE4-pilS5_pilE_pilS2                                                             | 0.0142 | 0.0115        | 2.57E-07   | 0.123   | 0.0238       | 0.158      | CRO        |
| group_861-group_485-group_935                                                                                                  | 0.0266 | 3.94E-05      | 2.91E-07   | 0.0586  | 0.0113       | 0.157      | CIP        |
| group_1541-group_68-group_914                                                                                                  | 0.108  | 2.47E-14      | 3.67E-07   | -0.0443 | 0.00866      | 0.156      | TET        |
| group_68-group_914-group_37                                                                                                    | 0.108  | 2.47E-14      | 3.67E-07   | -0.0443 | 0.00866      | 0.156      | TET        |
| group_1374-pilE1_pilE_1_pilE_pilE_2_pilS3_pilS6-pilS5_pilE_2_pilS5_2_pilE_pilE1_pilE_1_pilE_4                                  | 0.0427 | 0.000119      | 4.00E-07   | 0.105   | 0.0206       | 0.155      | TET        |
| group_914-group_37-group_915                                                                                                   | 0.694  | 5.88E-10      | 4.11E-07   | 0.0588  | 0.0115       | 0.155      | CIP        |
| group_495-ileS-group_1875                                                                                                      | 0.0636 | 0.000141      | 4.79E-07   | 0.104   | 0.0205       | 0.154      | AZM        |
| group_1613-group_504-group_412                                                                                                 | 0.0114 | 0.0924        | 5.28E-07   | -0.259  | 0.0513       | 0.154      | AZM        |

| variant                           | af     | filter-pvalue | lrt-pvalue | beta    | beta-std-err | variant_h2 | antibiotic |
|-----------------------------------|--------|---------------|------------|---------|--------------|------------|------------|
| group_303-group_1450-group_262    | 0.0142 | 1.14E-05      | 6.64E-07   | -0.113  | 0.0226       | 0.152      | TET        |
| group_1131-group_795-group_1138   | 0.743  | 0.123         | 6.87E-07   | 0.322   | 0.0645       | 0.152      | CRO        |
| group_771-group_1002-group_1138   | 0.743  | 0.123         | 6.87E-07   | 0.322   | 0.0645       | 0.152      | CRO        |
| group_1002-group_795-group_1131   | 0.257  | 0.123         | 6.87E-07   | -0.322  | 0.0645       | 0.152      | CRO        |
| group_771-group_1002-group_795    | 0.257  | 0.123         | 6.87E-07   | -0.322  | 0.0645       | 0.152      | CRO        |
| group_1986-group_1998-group_2014  | 0.22   | 0.155         | 7.61E-07   | -0.0673 | 0.0135       | 0.152      | TET        |
| group_1570-group_1673-group_668   | 0.0133 | 0.0188        | 9.18E-07   | 0.0905  | 0.0183       | 0.151      | CIP        |
| group_1821-group_1622-group_1145  | 0.018  | 2.29E-24      | 9.75E-07   | 0.118   | 0.024        | 0.15       | TET        |
| group_1821-group_1622-group_1145  | 0.0104 | 0.324         | 9.80E-07   | 0.331   | 0.0673       | 0.15       | PEN        |
| group_1329-group_1882-group_1779  | 0.0342 | 6.56E-27      | 1.02E-06   | 0.0822  | 0.0167       | 0.15       | TET        |
| group_945-group_1522-group_816    | 0.952  | 2.05E-07      | 1.07E-06   | 0.301   | 0.0613       | 0.15       | PEN        |
| coaD-group_1369-group_1909        | 0.0493 | 3.17E-08      | 1.14E-06   | 0.102   | 0.0208       | 0.149      | AZM        |
| group_1514-group_679-group_464    | 0.763  | 3.19E-12      | 1.15E-06   | 0.157   | 0.032        | 0.149      | PEN        |
| group_447-group_1761-group_1801   | 0.0674 | 4.34E-08      | 1.20E-06   | 0.0616  | 0.0126       | 0.149      | TET        |
| group_484-group_956-group_829     | 0.0503 | 3.22E-10      | 1.41E-06   | -0.0827 | 0.017        | 0.148      | TET        |
| rpoD-group_528-group_1522         | 0.0446 | 8.89E-10      | 1.54E-06   | -0.402  | 0.0831       | 0.147      | PEN        |
| group_816-group_1522-group_528    | 0.0446 | 8.89E-10      | 1.54E-06   | -0.402  | 0.0831       | 0.147      | PEN        |
| thpA-group_1552-group_1864        | 0.0417 | 1.51E-08      | 1.62E-06   | 0.111   | 0.0231       | 0.147      | AZM        |
| group_494-group_1864-group_1552   | 0.0417 | 1.51E-08      | 1.62E-06   | 0.111   | 0.0231       | 0.147      | AZM        |
| group_947-group_1749-group_1801   | 0.0835 | 5.84E-07      | 1.70E-06   | -0.059  | 0.0123       | 0.147      | TET        |
| group_1596-group_1720-group_75    | 0.0427 | 3.75E-55      | 1.89E-06   | -0.11   | 0.0229       | 0.146      | SMX        |
| group_393-group_262-group_1450    | 0.0152 | 3.16E-05      | 1.94E-06   | -0.104  | 0.0217       | 0.146      | TET        |
| group_171-group_1672-group_1229   | 0.107  | 3.42E-27      | 2.43E-06   | 0.228   | 0.048        | 0.145      | CRO        |
| group_1126-mafB_mafB_2-group_1187 | 0.756  | 4.03E-17      | 2.46E-06   | 0.131   | 0.0277       | 0.145      | PEN        |

**Table S3:** Significant sv-pan-GWAS results for antibiotic resistance in the EuroGASP collection

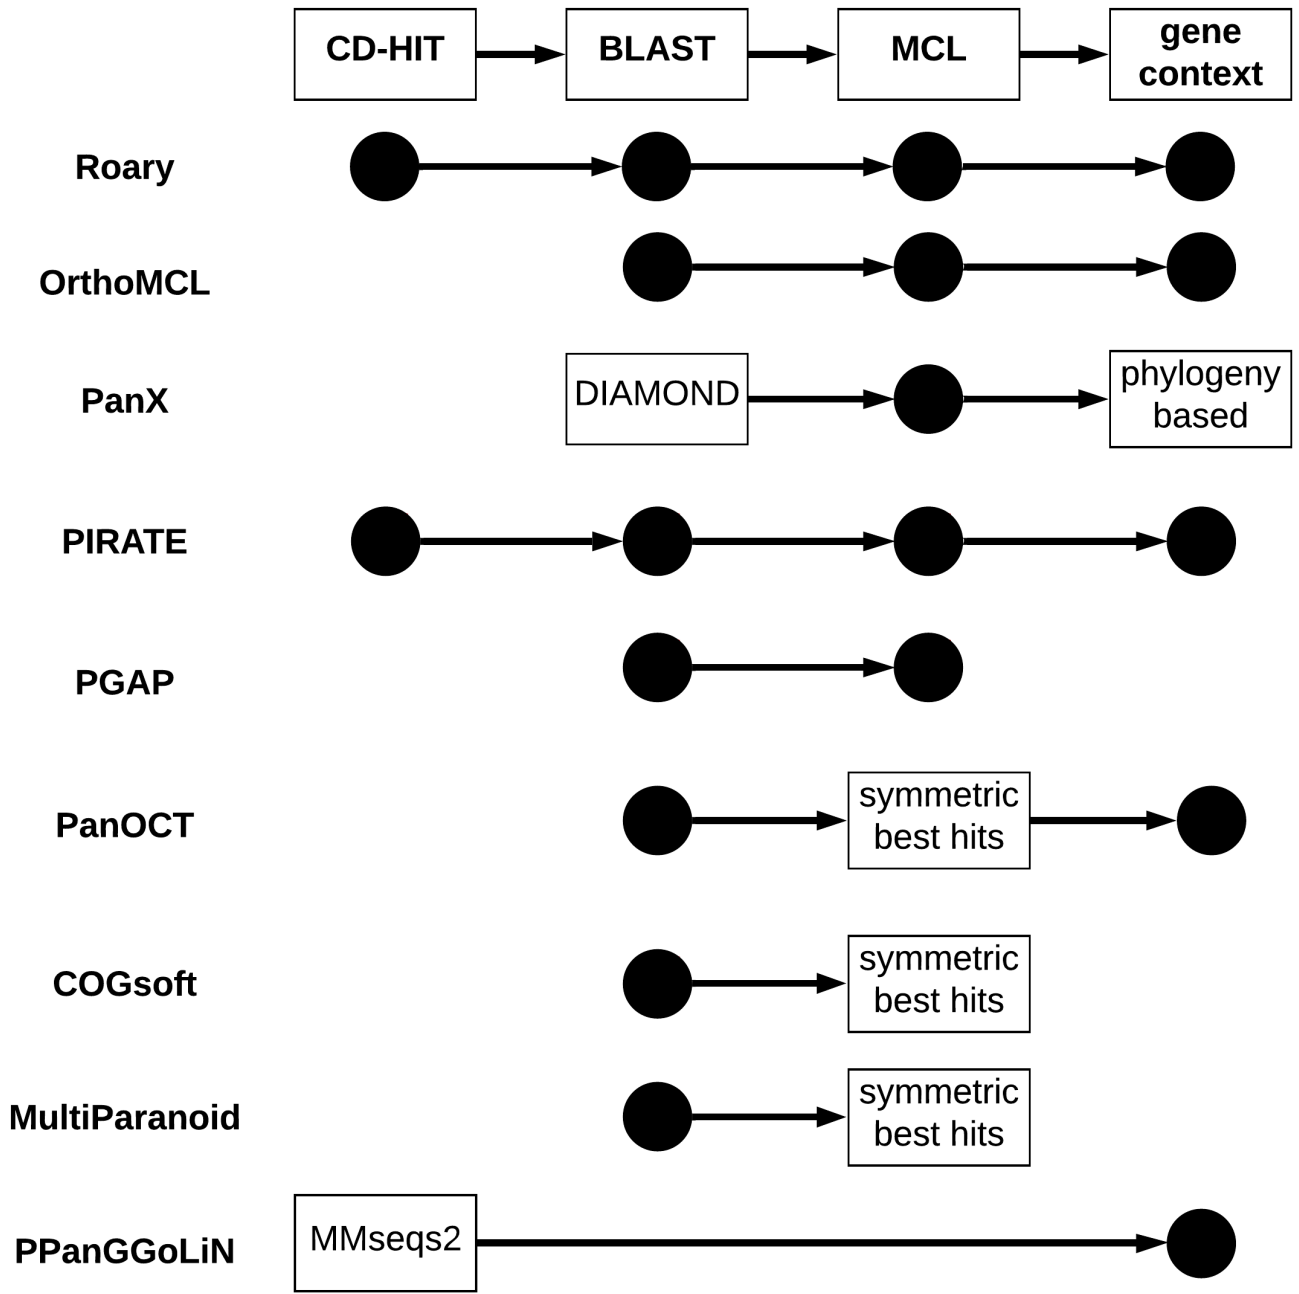

Figure S1: A comparison of the pipelines used by different pangenome analysis tools.

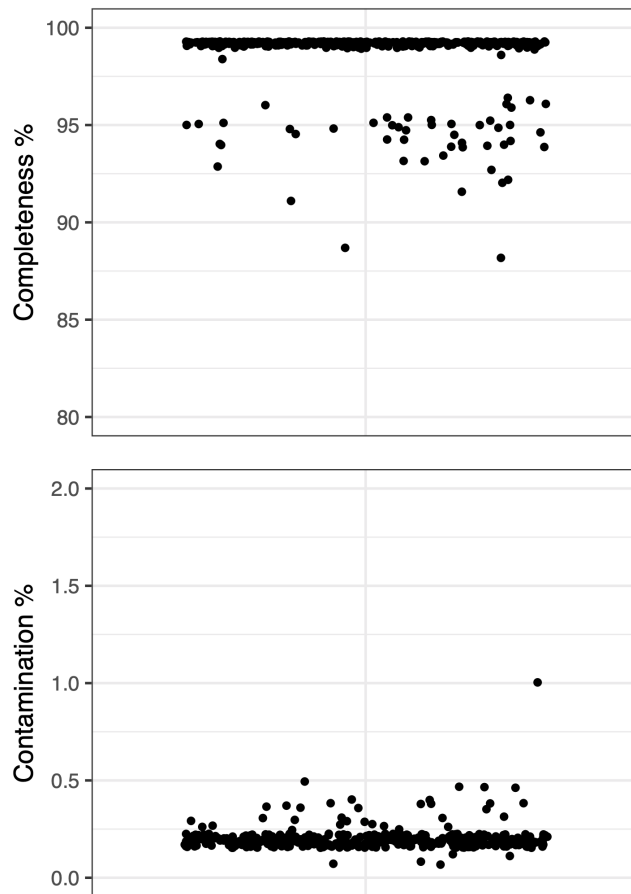

**Figure S2:** CheckM completeness and contamination estimates for the 413 *Mycobacterium tuberculosis* assemblies from an outbreak in London.

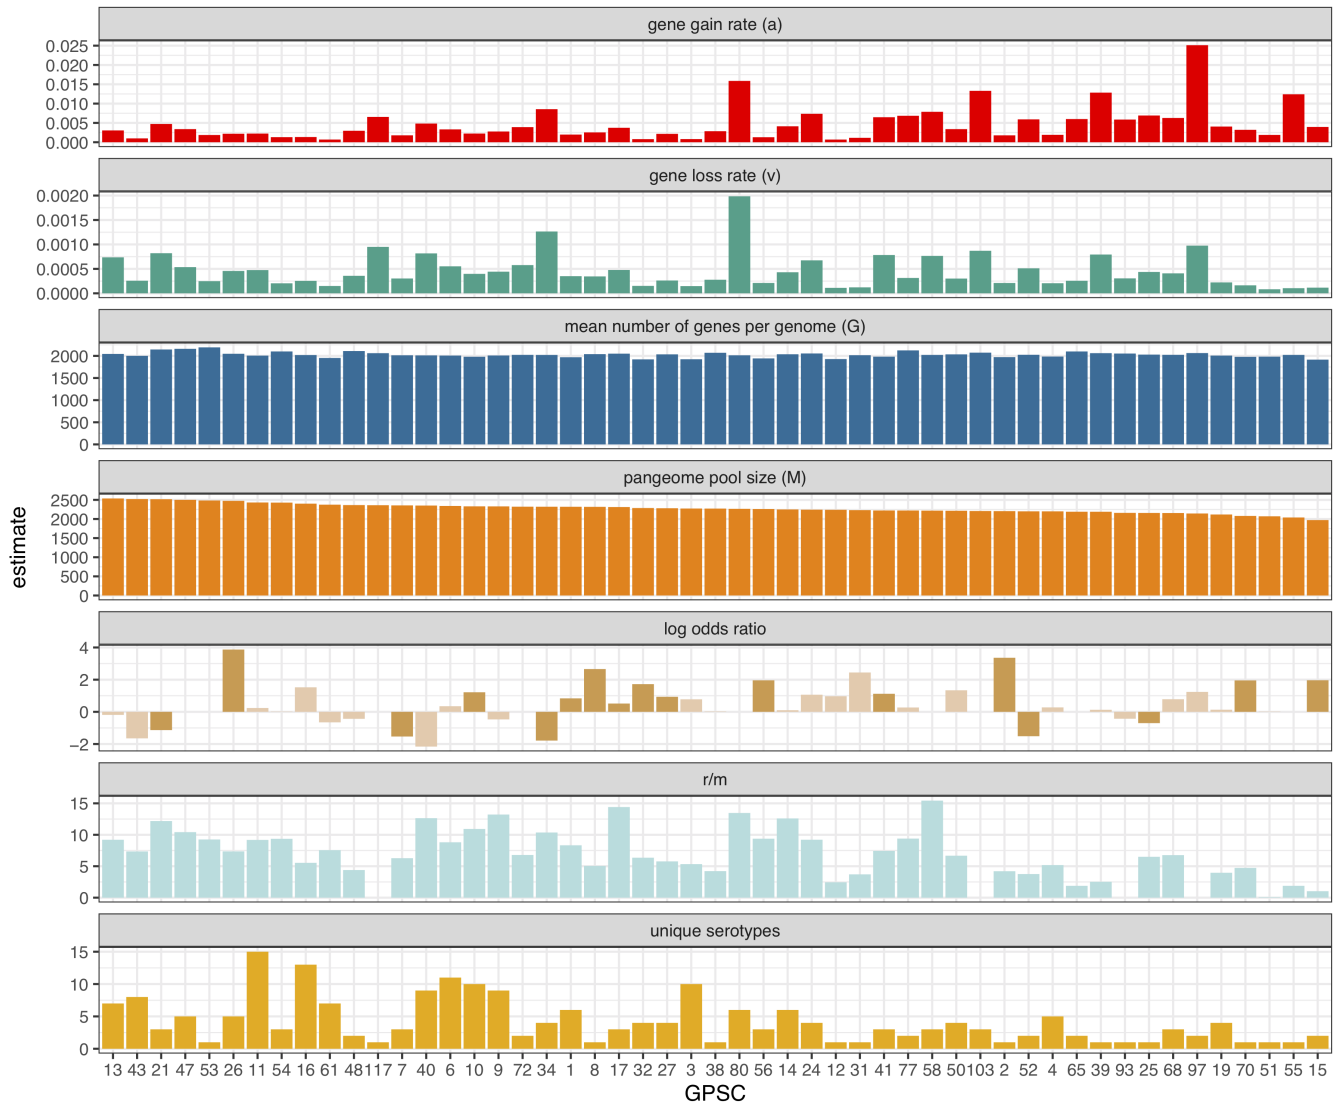

**Figure S3:** Inferred parameters for the Finitely Many Genes model for each of the 51 clusters of the global pneumococcal sequencing project for which reliable dated phylogenies could be inferred. The log odds ratio of invasive disease, number of unique serotypes and recombination rate given in (23) are also plotted for each cluster.

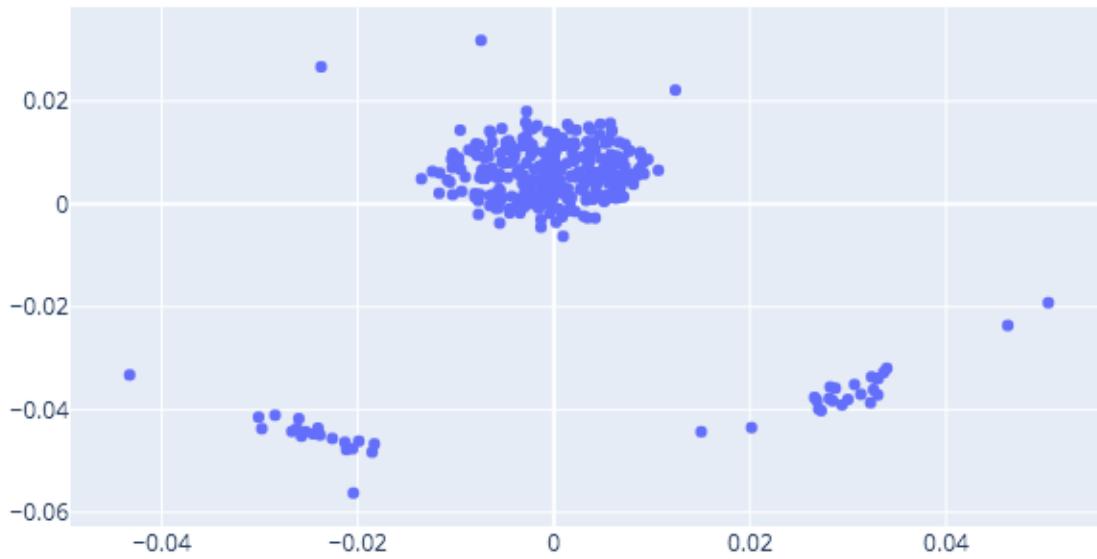

**Figure S4:** Multi Dimensional Scaling (MDS) plot of pairwise mash distances between isolates in the global *K. pneumoniae* dataset. This plot is produced by the Panaroo quality control script.

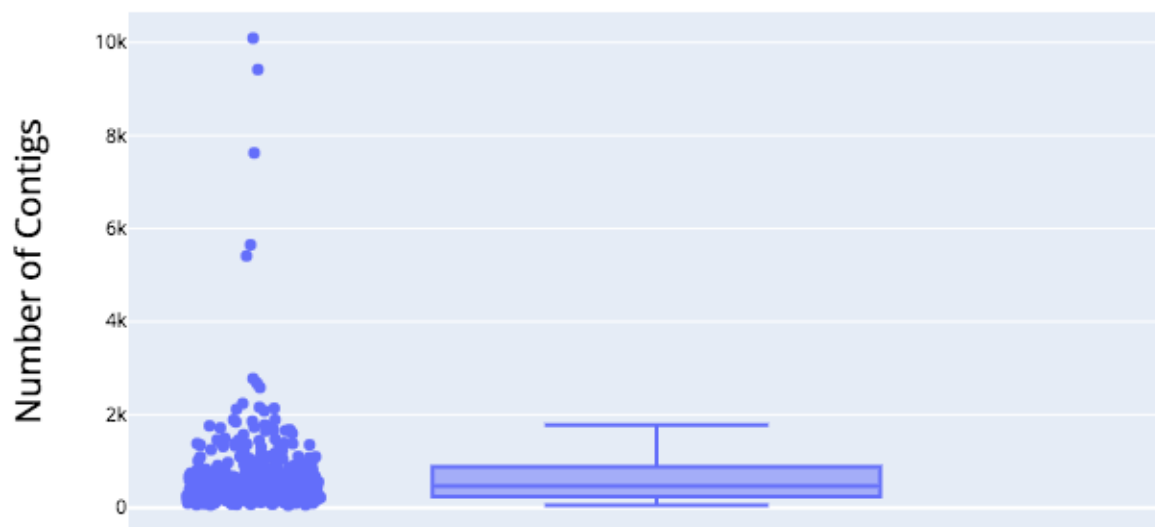

**Figure S5:** Boxplot produced by the Panaroo quality control script indicating the number of contigs in each of the *K. pneumoniae* assemblies.

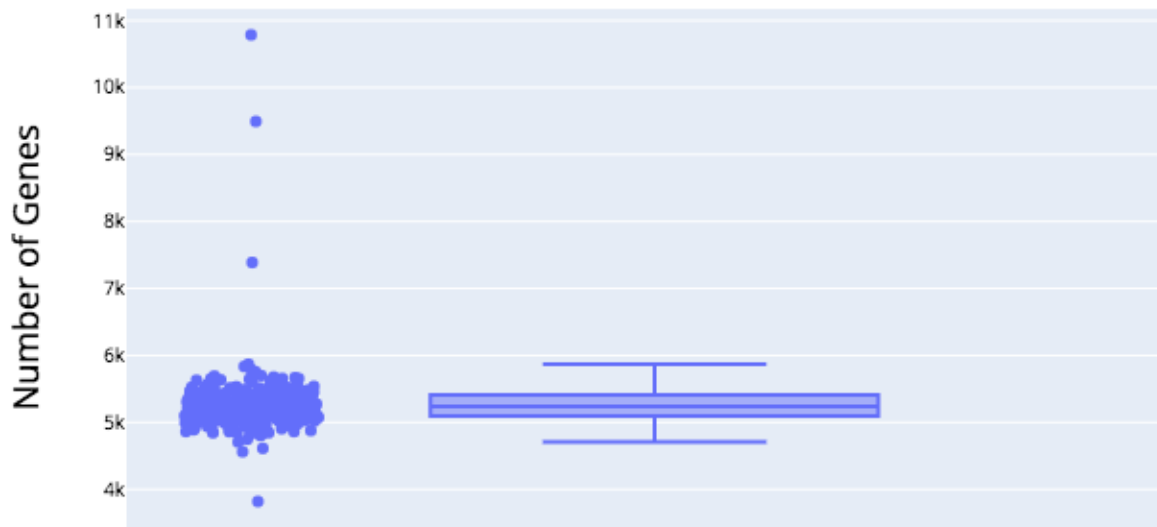

**Figure S6:** Boxplot produced by the Panaroo quality control script indicating the number of gene annotations in each of the *K. pneumoniae* assemblies.
